# Supplementary material
Source: publisher figshare collection journal article supplement (https://acs.figshare.com/ndownloader/files/21743112)
Supplement: Supplementary file 1 [file 21743112]

## Supporting Information

# A Metal-Organic-Framework-Derived (Zn<sub>0.95</sub>Cu<sub>0.05</sub>)<sub>0.6</sub>Cd<sub>0.4</sub>S Solid Solution as Efficient Photocatalyst for Hydrogen Evolution Reaction

Jing Liu,<sup>†</sup> Jianrui Feng,<sup>†</sup> Lele Lu,<sup>†</sup> Boyuan Wu,<sup>†</sup> Peng Ren,<sup>\*,‡</sup> Wei Shi<sup>\*,†</sup> and Peng  
Cheng<sup>†</sup>

<sup>†</sup>Key Laboratory of Advanced Energy Materials Chemistry (MOE), College of  
Chemistry, Nankai University, Tianjin 300071, China

<sup>‡</sup>School of Science, Harbin Institute of Technology (Shenzhen), Shenzhen 518055,  
China

\*E-mail: shiwei@nankai.edu.cn (W.S.)

\*E-mail: renpeng@hit.edu.cn (P.R.)

## Table of Contents

|                      |                                                                                                                                           |
|----------------------|-------------------------------------------------------------------------------------------------------------------------------------------|
| EXPERIMENTAL SECTION | S-4-S-6                                                                                                                                   |
| <b>Figure S1</b>     | SEM image of Cd-MOF. S-7                                                                                                                  |
| <b>Figure S2</b>     | PXRD patterns of (Zn <sub>1-x</sub> Cu <sub>x</sub> )-MOF. S-7                                                                            |
| <b>Figure S3</b>     | PXRD patterns of (Zn <sub>1-x</sub> Cu <sub>x</sub> )S solid solutions. S-7                                                               |
| <b>Figure S4</b>     | Comparison of photocatalytic HER rates with (Zn <sub>1-x</sub> Cu <sub>x</sub> )S<br>heterojunctions under visible-light irradiation. S-8 |
| <b>Figure S5</b>     | PXRD patterns of (Zn <sub>0.95</sub> Cu <sub>0.05</sub> ) <sub>1-x</sub> Cd <sub>x</sub> -MOF. S-8                                        |

|                   |                                                                                                                                                                                                                                                                                                                                                                                                                                |      |
|-------------------|--------------------------------------------------------------------------------------------------------------------------------------------------------------------------------------------------------------------------------------------------------------------------------------------------------------------------------------------------------------------------------------------------------------------------------|------|
| <b>Figure S6</b>  | TG curves of $(\text{Zn}_{0.95}\text{Cu}_{0.05})_{1-x}\text{Cd}_x\text{-MOF}$ .                                                                                                                                                                                                                                                                                                                                                | S-8  |
| <b>Figure S7</b>  | PXRD patterns of $(\text{Zn}_{1-x}\text{Cd}_x)\text{S}$ solid solutions.                                                                                                                                                                                                                                                                                                                                                       | S-9  |
| <b>Figure S8</b>  | Elemental mapping images of $(\text{Zn}_{0.95}\text{Cu}_{0.05})\text{-MOF}$ .                                                                                                                                                                                                                                                                                                                                                  | S-9  |
| <b>Figure S9</b>  | Elemental mapping images of $(\text{Zn}_{0.95}\text{Cu}_{0.05})_{0.8}\text{Cd}_{0.2}\text{-MOF}$ .                                                                                                                                                                                                                                                                                                                             | S-9  |
| <b>Figure S10</b> | Elemental mapping images of $(\text{Zn}_{0.95}\text{Cu}_{0.05})_{0.6}\text{Cd}_{0.4}\text{-MOF}$ .                                                                                                                                                                                                                                                                                                                             | S-10 |
| <b>Figure S11</b> | Elemental mapping images of $(\text{Zn}_{0.95}\text{Cu}_{0.05})_{0.4}\text{Cd}_{0.6}\text{-MOF}$ .                                                                                                                                                                                                                                                                                                                             | S-10 |
| <b>Figure S12</b> | Elemental mapping images of $(\text{Zn}_{0.95}\text{Cu}_{0.05})_{0.2}\text{Cd}_{0.8}\text{-MOF}$ .                                                                                                                                                                                                                                                                                                                             | S-10 |
| <b>Figure S13</b> | Elemental mapping images of Cd-MOF.                                                                                                                                                                                                                                                                                                                                                                                            | S-11 |
| <b>Figure S14</b> | EDS patterns of $(\text{Zn}_{0.95}\text{Cu}_{0.05})\text{-MOF}$ (a), $(\text{Zn}_{0.95}\text{Cu}_{0.05})_{0.8}\text{Cd}_{0.2}\text{-MOF}$ (b), $(\text{Zn}_{0.95}\text{Cu}_{0.05})_{0.6}\text{Cd}_{0.4}\text{-MOF}$ (c), $(\text{Zn}_{0.95}\text{Cu}_{0.05})_{0.4}\text{Cd}_{0.6}\text{-MOF}$ (d), $(\text{Zn}_{0.95}\text{Cu}_{0.05})_{0.2}\text{Cd}_{0.8}\text{-MOF}$ (e) and Cd-MOF (f).                                    | S-11 |
| <b>Figure S15</b> | SEM images of $(\text{Zn}_{0.95}\text{Cu}_{0.05})\text{S}$ (a), $(\text{Zn}_{0.95}\text{Cu}_{0.05})_{0.8}\text{Cd}_{0.2}\text{S}$ (b), $(\text{Zn}_{0.95}\text{Cu}_{0.05})_{0.6}\text{Cd}_{0.4}\text{S}$ (c), $(\text{Zn}_{0.95}\text{Cu}_{0.05})_{0.4}\text{Cd}_{0.6}\text{S}$ (d), $(\text{Zn}_{0.95}\text{Cu}_{0.05})_{0.2}\text{Cd}_{0.8}\text{S}$ (e) and CdS (f).                                                        | S-12 |
| <b>Figure S16</b> | (a) XPS full-spectrum of $(\text{Zn}_{0.95}\text{Cu}_{0.05})_{0.4}\text{Cd}_{0.6}\text{S}$ , (b) Cu 2p spectrum, (c) Zn 2p spectrum, (d) Cd 3d spectrum, (e) S 2p spectrum and (f) C1s spectrum.                                                                                                                                                                                                                               | S-13 |
| <b>Figure S17</b> | Nitrogen adsorption/desorption isotherms of CdS and $(\text{Zn}_{0.95}\text{Cu}_{0.05})_{0.6}\text{Cd}_{0.4}\text{S}$ .                                                                                                                                                                                                                                                                                                        | S-14 |
| <b>Figure S18</b> | BJH pore size distribution from adsorption branch of CdS and $(\text{Zn}_{0.95}\text{Cu}_{0.05})_{0.6}\text{Cd}_{0.4}\text{S}$ .                                                                                                                                                                                                                                                                                               | S-14 |
| <b>Figure S19</b> | The bandgaps of $(\text{Zn}_{0.95}\text{Cu}_{0.05})\text{S}$ (a), $(\text{Zn}_{0.95}\text{Cu}_{0.05})_{0.8}\text{Cd}_{0.2}\text{S}$ (b), $(\text{Zn}_{0.95}\text{Cu}_{0.05})_{0.6}\text{Cd}_{0.4}\text{S}$ (c), $(\text{Zn}_{0.95}\text{Cu}_{0.05})_{0.4}\text{Cd}_{0.6}\text{S}$ (d), $(\text{Zn}_{0.95}\text{Cu}_{0.05})_{0.2}\text{Cd}_{0.8}\text{S}$ (e) and CdS (f) calculated according to the Kubelka-Munk (KM) method. | S-15 |
| <b>Figure S20</b> | Mechanism of $(\text{Zn}_{0.95}\text{Cu}_{0.05})_{0.6}\text{Cd}_{0.4}\text{S}$ and CdS for photocatalytic hydrogen production.                                                                                                                                                                                                                                                                                                 | S-15 |
| <b>Figure S21</b> | Decay curves and luminescent lifetimes of $(\text{Zn}_{0.95}\text{Cu}_{0.05})\text{S}$                                                                                                                                                                                                                                                                                                                                         | S-16 |

|                   |                                                                                                                                                                                                                                                                                                                       |           |
|-------------------|-----------------------------------------------------------------------------------------------------------------------------------------------------------------------------------------------------------------------------------------------------------------------------------------------------------------------|-----------|
|                   | (a), $(\text{Zn}_{0.95}\text{Cu}_{0.05})_{0.8}\text{Cd}_{0.2}\text{S}$ (b), $(\text{Zn}_{0.95}\text{Cu}_{0.05})_{0.6}\text{Cd}_{0.4}\text{S}$ (c), $(\text{Zn}_{0.95}\text{Cu}_{0.05})_{0.4}\text{Cd}_{0.6}\text{S}$ (d), $(\text{Zn}_{0.95}\text{Cu}_{0.05})_{0.2}\text{Cd}_{0.8}\text{S}$ (e) and $\text{CdS}$ (f). |           |
| <b>Figure S22</b> | PXRD patterns of $(\text{Zn}_{1-x}\text{Cd}_x)\text{-MOF}$ .                                                                                                                                                                                                                                                          | S-16      |
| <b>Figure S23</b> | PXRD patterns of $(\text{Zn}_{1-x}\text{Cd}_x)\text{S}$ solid solutions.                                                                                                                                                                                                                                              | S-17      |
| <b>Figure S24</b> | Photocatalytic performance of $(\text{Zn}_{1-x}\text{Cd}_x)\text{S}$ solid solutions.                                                                                                                                                                                                                                 | S-17      |
| <b>Figure S25</b> | Comparison of photocatalytic HER of $(\text{Zn}_{1-x}\text{Cd}_x)\text{S}$ solid solutions.                                                                                                                                                                                                                           | S-17      |
| <b>Figure S26</b> | XRD patterns of $(\text{Zn}_{0.95}\text{Cu}_{0.05})_{0.6}\text{Cd}_{0.4}\text{S}$ collected after photocatalytic hydrogen evolution experiment.                                                                                                                                                                       | S-18      |
| <b>Figure S27</b> | TEM image and elemental mapping images of $(\text{Zn}_{0.95}\text{Cu}_{0.05})_{0.6}\text{Cd}_{0.4}\text{S}$ after photocatalytic hydrogen evolution experiment.                                                                                                                                                       | S-18      |
| <b>Figure S28</b> | Solid solution model of $(\text{Zn}_{0.95}\text{Cu}_{0.05})_{0.6}\text{Cd}_{0.4}\text{S}$                                                                                                                                                                                                                             | S-19      |
| <b>Table S1</b>   | The experimental data of ICP-OES and elemental analyses of $(\text{Zn}_{0.95}\text{Cu}_{0.05})_{1-x}\text{Cd}_x\text{S}$ solid solutions.                                                                                                                                                                             | S-19      |
| <b>Table S2</b>   | The energy positions of conduction and valence bands of samples. (ECB based on Mott-Schottky plots)                                                                                                                                                                                                                   | S-20      |
| <b>Table S3.</b>  | Comparison of the $\text{H}_2$ -production rates of $\text{CuS}_x$ cocatalysts solid solution for water splitting                                                                                                                                                                                                     | S-20      |
| <b>Table S4</b>   | Comparison of the $\text{H}_2$ -production rates of $\text{CdS}$ -based solid solution heterojunction for water splitting.                                                                                                                                                                                            | S-21-S-22 |
| <b>Reference</b>  |                                                                                                                                                                                                                                                                                                                       | S-23-S-25 |

## EXPERIMENTAL SECTION

**Preparation of  $(\text{Zn}_{0.95}\text{Cu}_{0.05})_{1-x}\text{Cd}_x\text{-MOF}$ .**  $\text{Cd}(\text{NO}_3)_2 \cdot 4\text{H}_2\text{O}$  ( $x$  mmol),  $\text{Cu}(\text{NO}_3)_2 \cdot 3\text{H}_2\text{O}$  ( $y$  mmol),  $\text{Zn}(\text{NO}_3)_2 \cdot 6\text{H}_2\text{O}$  ( $19y$  mmol), ( $x / 20y = 0, 1/4, 2/3, 3/2, 4/1, 1, x + 20y = 1.69$ ), and PVP (1.0 g) were dissolved in DMF (30 mL) followed by addition of a DMF solution (30 mL) containing  $\text{H}_2\text{bdc}$  (0.501 g, 3.02 mmol) and PVP (1.0 g). After ultrasonic treatment, the solution was refluxed at 115 °C for 5 h. After natural refrigeration, the products were obtained via centrifugation, washed with DMF and methanol three times, respectively and then dried at 50 °C overnight. Finally, the products  $(\text{Zn}_{0.95}\text{Cu}_{0.05})_{1-x}\text{Cd}_x\text{-MOF}$  ( $(\text{Zn}_{0.95}\text{Cu}_{0.05})\text{-MOF}$ ,  $(\text{Zn}_{0.95}\text{Cu}_{0.05})_{0.8}\text{Cd}_{0.2}\text{-MOF}$ ,  $(\text{Zn}_{0.95}\text{Cu}_{0.05})_{0.6}\text{Cd}_{0.4}\text{-MOF}$ ,  $(\text{Zn}_{0.95}\text{Cu}_{0.05})_{0.4}\text{Cd}_{0.6}\text{-MOF}$ ,  $(\text{Zn}_{0.95}\text{Cu}_{0.05})_{0.2}\text{Cd}_{0.8}\text{-MOF}$  and  $\text{Cd-MOF}$ ) were obtained.

**Preparation of  $\text{Zn}_{1-x}\text{Cd}_x\text{-MOF}$ .** Similar to the synthetic method of  $(\text{Zn}_{0.95}\text{Cu}_{0.05})_{1-x}\text{Cd}_x\text{-MOF}$ , while  $\text{Cu}(\text{NO}_3)_2 \cdot 3\text{H}_2\text{O}$  was replaced with  $\text{Zn}(\text{NO}_3)_2 \cdot 6\text{H}_2\text{O}$  absolutely, and the products  $\text{Zn}_x\text{Cd}_{1-x}\text{-MOF}$  ( $\text{Zn-MOF}$ ,  $\text{Zn}_{0.8}\text{Cd}_{0.2}\text{-MOF}$ ,  $\text{Zn}_{0.6}\text{Cd}_{0.4}\text{-MOF}$ ,  $\text{Zn}_{0.4}\text{Cd}_{0.6}\text{-MOF}$ ,  $\text{Zn}_{0.2}\text{Cd}_{0.8}\text{-MOF}$  and  $\text{Cd-MOF}$ ) were obtained.

**Materials characterization.** The as-prepared nanocatalysts were characterized via powder X-ray diffraction (PXRD, D/Max-2500 X-ray diffractometer using Cu K $\alpha$  radiation,  $\lambda = 1.54056 \text{ \AA}$ , at a scan speed of  $5^\circ \text{ min}^{-1}$  in the range  $2\theta = 10\text{-}80^\circ$ ), thermogravimetric analyses (TGA, Labsys NETZSCH TG 209 Setaram apparatus with increasing rate of  $10^\circ \text{ C min}^{-1}$  from 25 to 800 °C under  $\text{N}_2$  atmosphere), X-ray photoelectron spectroscopy (XPS, Axis Ultra DLD), UV-vis spectroscopy (Jasco V-570 spectrophotometer), photoluminescence spectroscopy (PL, Agilent Cary

Eclipse spectrophotometer), elemental analyses (C, H and N, Perkin-Elmer 2400-II CHNS/O analyzer), inductively coupled plasma optical emission spectrometry (ICP-OES, Spectro-Blue), scanning electron microscopy (SEM, JEOL JSM 7500F), transmission electron microscopy (TEM, FEI Tecnai G20), and nitrogen sorption isotherms measurement (Autosorb-IQ2 (Quantachrome Instruments), 77 K). The photoelectrochemical experiments were carried out in a CHI660D electrochemical system with a standard three-electrode configuration containing a Pt flake as the counter electrode, an Ag/AgCl reference electrode, and the synthesized catalysts as the working electrode in 0.1 M Na<sub>2</sub>SO<sub>4</sub> solution. The working electrode was prepared on the basis of the literature.<sup>1</sup> A 300 W Xe lamp equipped with a 420 nm cut-off filter was used as the light source.

**Photocatalytic activity tests.** The photocatalytic activity for water splitting tests was conducted using a 300 W Xe lamp (PLS-SXE 300C, Beijing Perfect Light Co. Ltd, China, wavelength: 320-780 nm) as light source. The reactor was linked to a closed gas circulation and evacuation system. A typical hydrogen production experiment was performed by dispersing 50 mg catalyst in an aqueous solution involving Na<sub>2</sub>S·9H<sub>2</sub>O (35.0 mmol, 8.4 g) and Na<sub>2</sub>SO<sub>3</sub> (25.0 mmol, 3.15 g) as the sacrificial electron donors. The reaction system was sealed and removed residual air thoroughly. The reaction system was investigated under irradiation through a 420 nm cut-off filter with a settled distance (10 cm), and the system temperature was maintained at 5 °C via water circulation under continuous magnetic stirring. The amount of gas product was

detected via gas chromatography using a thermal conductive detector (TCD) with N<sub>2</sub> as the carrier gas.

**Calculation Method and Models.** In this work, density functional theory (DFT) based calculations were implemented by the Vienna ab initio simulation package (VASP) to optimize the structures and calculate the projected band structure and projected density of states (PDOS). The ion-electron interactions were depicted by projector augmented waves (PAW)<sup>2</sup> when the function of Perdew, Burke and Ernzerhof (PBE)<sup>3</sup> based on the generalized gradient approximation (GGA) was adopted to describe the exchange and correlation potential. In this calculation, 7\*7\*7 Monkhorst-Pack<sup>4</sup> sampled k points were used and a cut-off energy of 400 eV was adopted. The threshold of convergence was set to  $1 \times 10^{-5}$  eV and 0.01 eV/Å for the self-consistent field (SCF) and ion steps, respectively. It should be noted that the method of DFT always underestimates the band gaps of semiconductors, though the qualitative conclusions from DFT calculations are usually reliable to illustrate the trends. The high-symmetry points in band structure are G (0, 0, 0), A (0, 0, 0.5), H (-0.333, 0.667, 0.5), K (-0.333, 0.667, 0), M (0, 0.5, 0) and L (0, 0.5, 0.5).

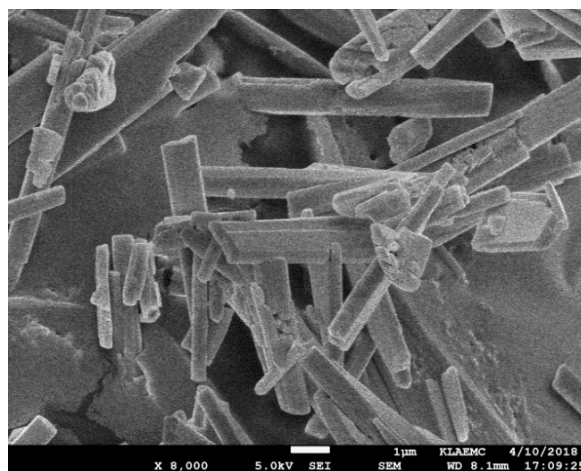

**Figure S1** SEM image of Cd-MOF.

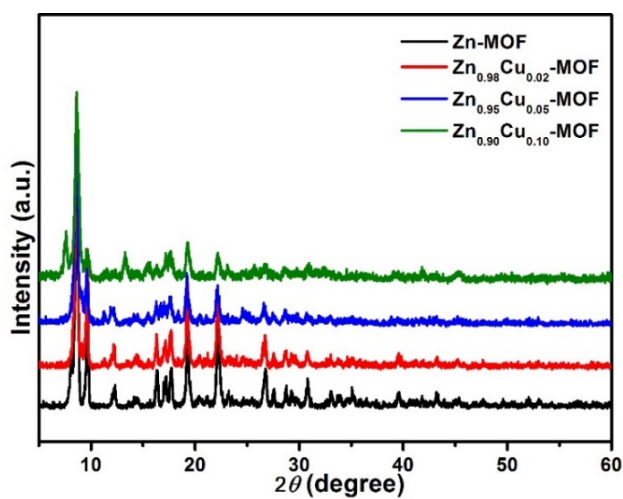

**Figure S2** PXRD patterns of (Zn<sub>1-x</sub>Cu<sub>x</sub>)-MOF (x=0, 0.02, 0.05, 0.10).

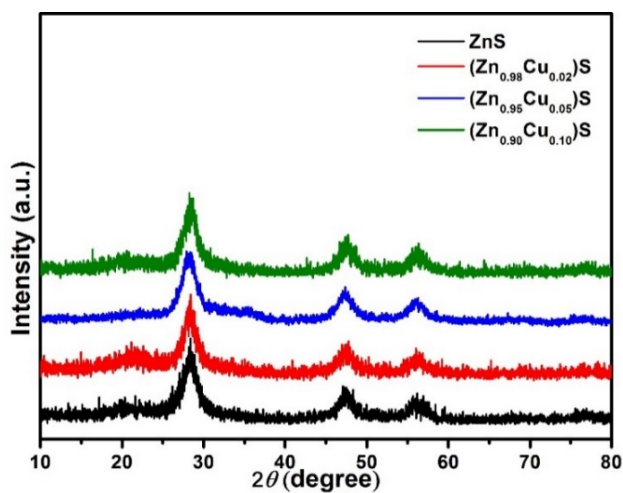

**Figure S3** PXRD patterns of (Zn<sub>1-x</sub>Cu<sub>x</sub>)S solid solutions (x=0, 0.02, 0.05, 0.10).

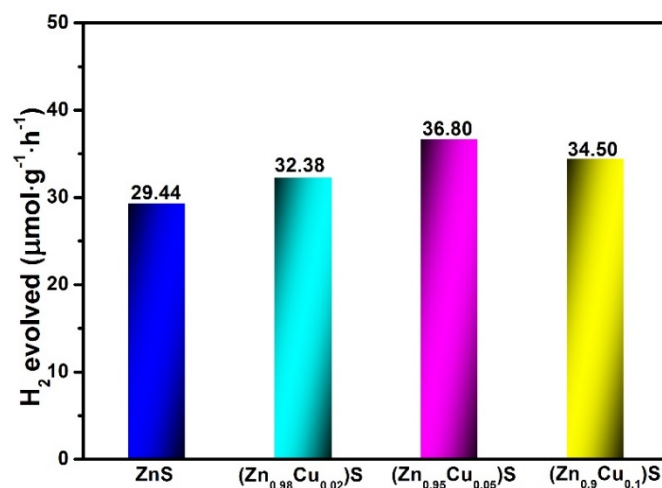

**Figure S4** Comparison of photocatalytic HER rates with  $(\text{Zn}_{1-x}\text{Cu}_x)\text{S}$  solid solutions under visible-light irradiation.

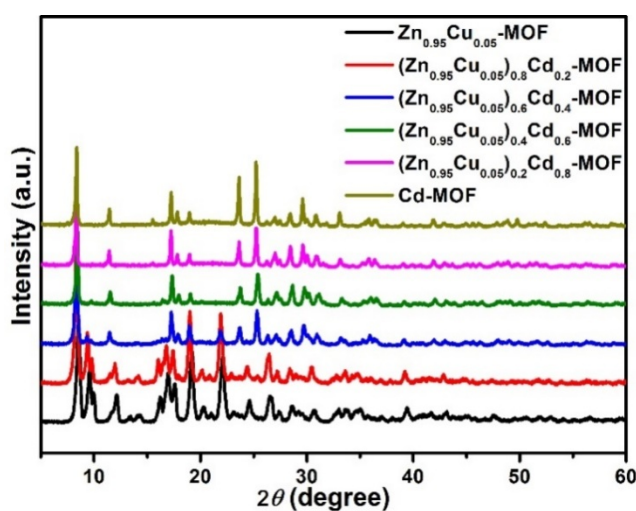

**Figure S5** PXRD patterns of  $(\text{Zn}_{0.95}\text{Cu}_{0.05})_{1-x}\text{Cd}_x\text{-MOF}$ .

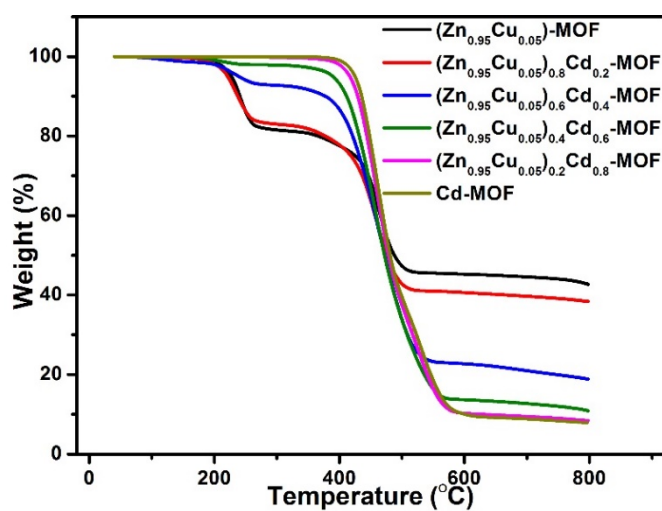

**Figure S6** TGA curves of  $(\text{Zn}_{0.95}\text{Cu}_{0.05})_{1-x}\text{Cd}_x\text{-MOF}$ .



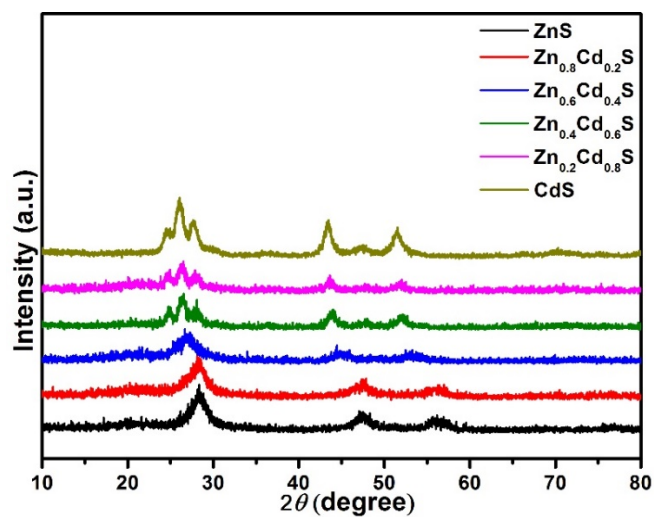

**Figure S7** PXRD patterns of  $(\text{Zn}_{1-x}\text{Cd}_x)\text{S}$  solid solutions ( $x=0, 0.2, 0.4, 0.6, 0.8, 1.0$ ).

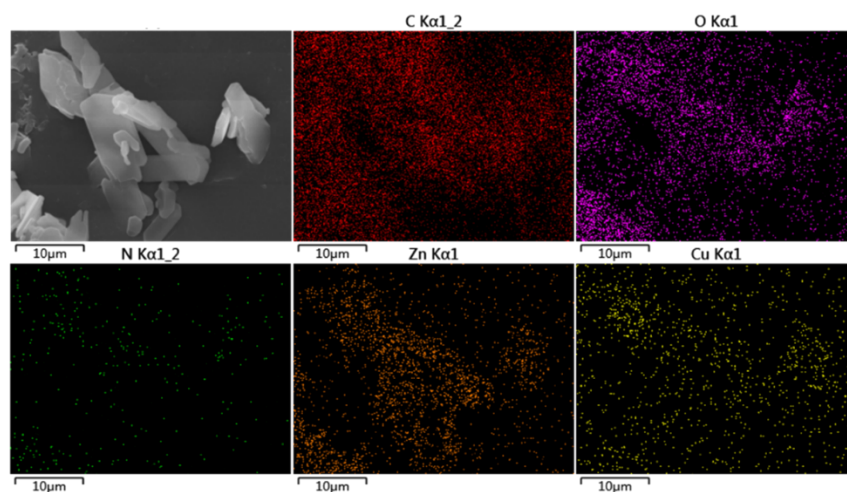

**Figure S8** Elemental mapping images of  $(\text{Zn}_{0.95}\text{Cu}_{0.05})\text{-MOF}$ .

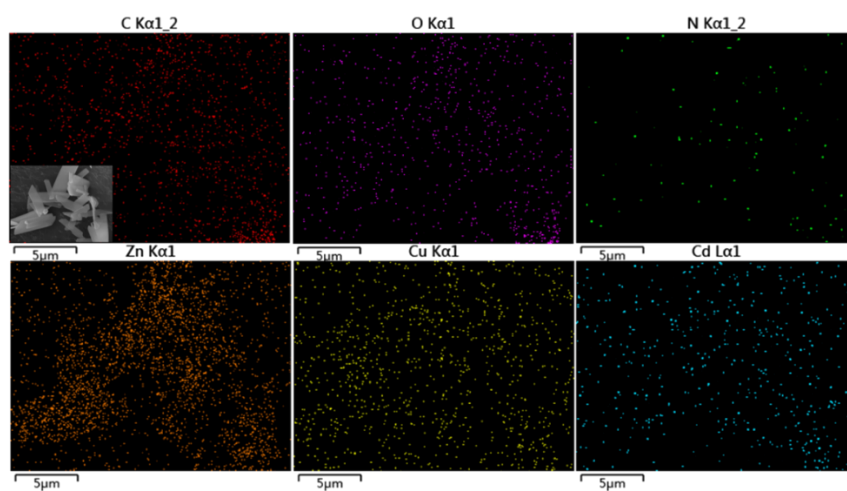

**Figure S9** Elemental mapping images of  $(\text{Zn}_{0.95}\text{Cu}_{0.05})_{0.8}\text{Cd}_{0.2}\text{-MOF}$ .

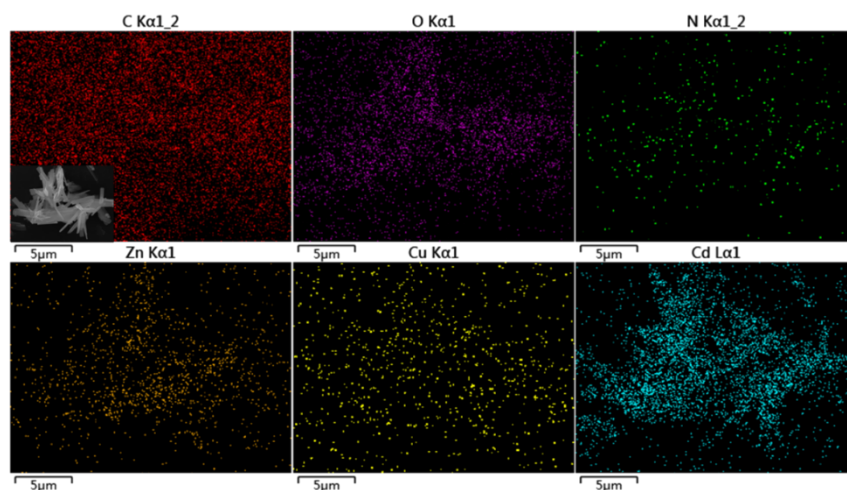

**Figure S10** Elemental mapping images of  $(\text{Zn}_{0.95}\text{Cu}_{0.05})_{0.6}\text{Cd}_{0.4}\text{-MOF}$ .

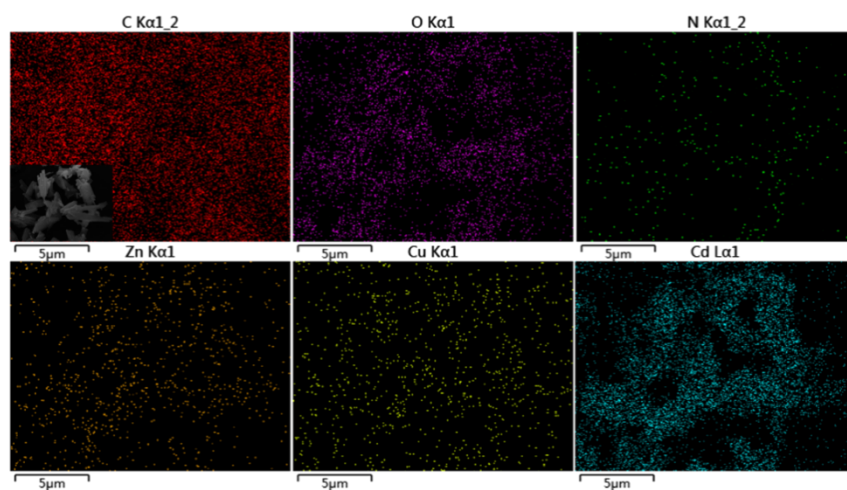

**Figure S11** Elemental mapping images of  $(\text{Zn}_{0.95}\text{Cu}_{0.05})_{0.4}\text{Cd}_{0.6}\text{-MOF}$ .

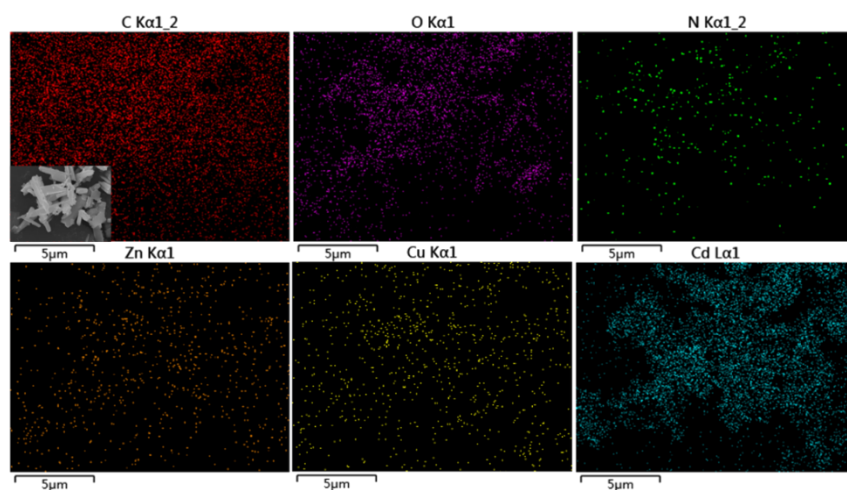

**Figure S12** Elemental mapping images of  $(\text{Zn}_{0.95}\text{Cu}_{0.05})_{0.2}\text{Cd}_{0.8}\text{-MOF}$ .

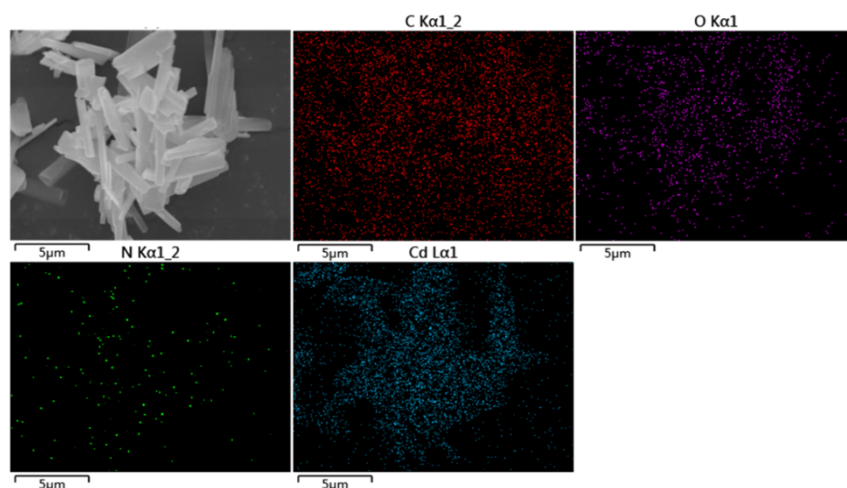

**Figure S13** Elemental mapping images of Cd-MOF.

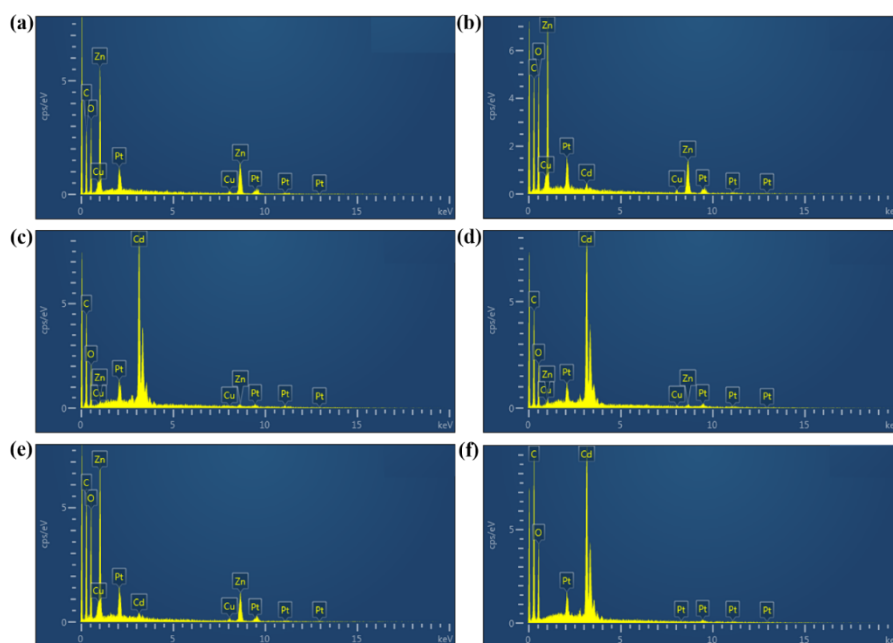

**Figure S14** EDS patterns of  $(\text{Zn}_{0.95}\text{Cu}_{0.05})\text{-MOF}$  (a),  $(\text{Zn}_{0.95}\text{Cu}_{0.05})_{0.8}\text{Cd}_{0.2}\text{-MOF}$  (b),  $(\text{Zn}_{0.95}\text{Cu}_{0.05})_{0.6}\text{Cd}_{0.4}\text{-MOF}$  (c),  $(\text{Zn}_{0.95}\text{Cu}_{0.05})_{0.4}\text{Cd}_{0.6}\text{-MOF}$  (d),  $(\text{Zn}_{0.95}\text{Cu}_{0.05})_{0.2}\text{Cd}_{0.8}\text{-MOF}$  (e) and Cd-MOF (f). The preparation techniques for EDX as follow: Firstly, stick the conductive adhesive tape on the sample holder; secondly, sprinkle the powder sample evenly on it and blow off the non-stick powder with an ear wash ball, and then spray a conductive layer (Pt) for testing.

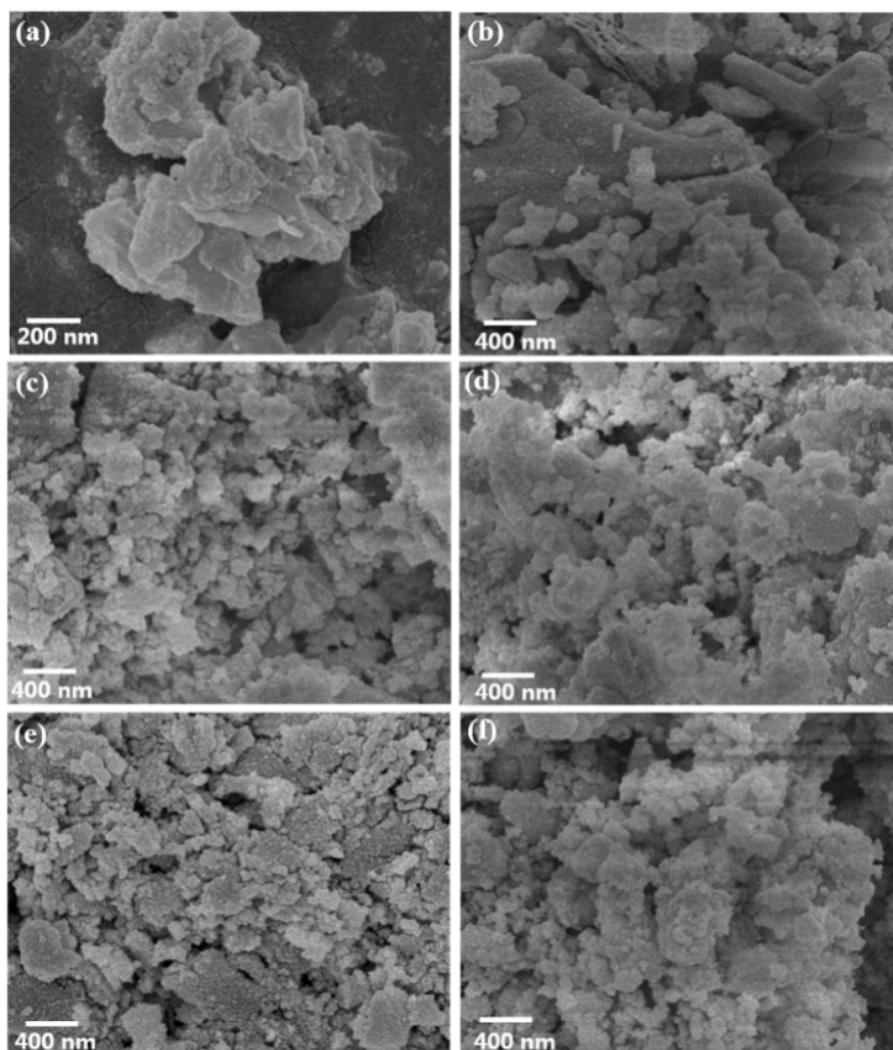

**Figure S15** SEM images of  $(\text{Zn}_{0.95}\text{Cu}_{0.05})\text{S}$  (a),  $(\text{Zn}_{0.95}\text{Cu}_{0.05})_{0.8}\text{Cd}_{0.2}\text{S}$  (b),  $(\text{Zn}_{0.95}\text{Cu}_{0.05})_{0.6}\text{Cd}_{0.4}\text{S}$  (c),  $(\text{Zn}_{0.95}\text{Cu}_{0.05})_{0.4}\text{Cd}_{0.6}\text{S}$  (d),  $(\text{Zn}_{0.95}\text{Cu}_{0.05})_{0.2}\text{Cd}_{0.8}\text{S}$  (e) and  $\text{CdS}$  (f).

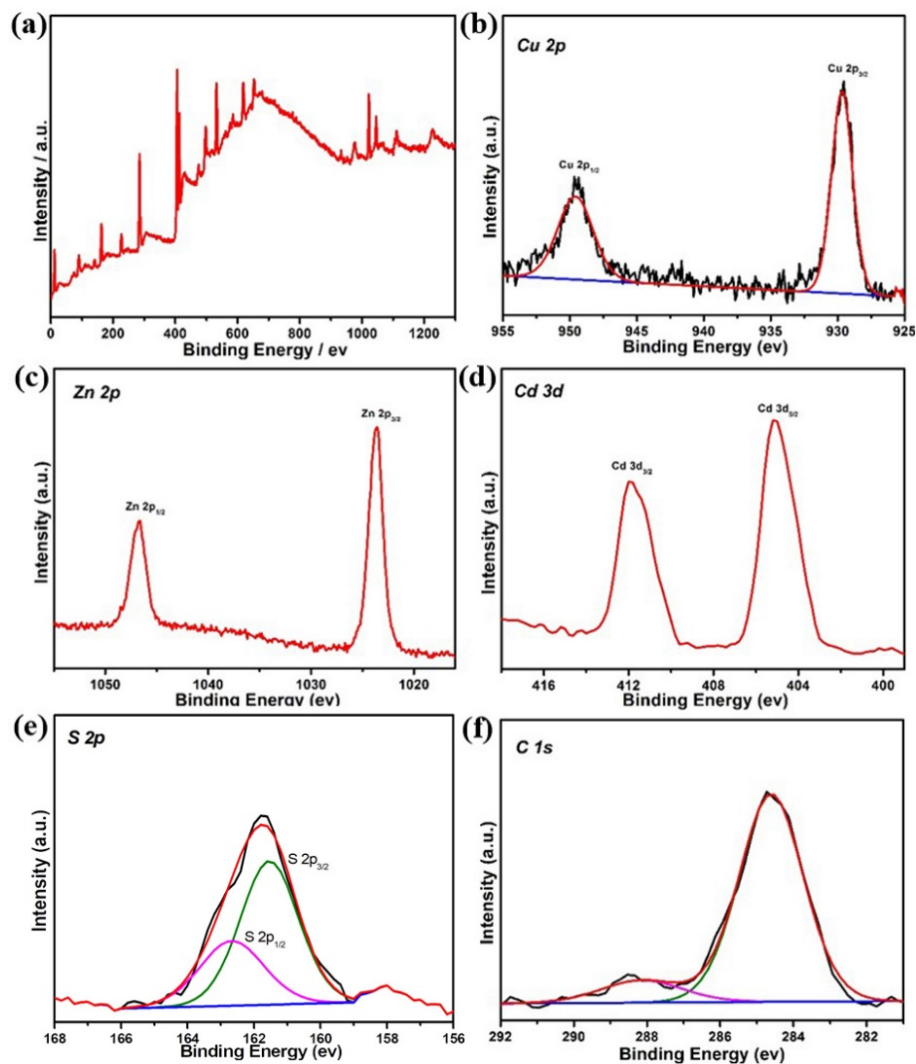

**Figure S16** (a) XPS full-spectrum of  $(\text{Zn}_{0.95}\text{Cu}_{0.05})_{0.6}\text{Cd}_{0.4}\text{S}$ , (b) Cu 2p spectrum, (c) Zn 2p spectrum, (d) Cd 3d spectrum, (e) S 2p spectrum and (f) C 1s spectrum.

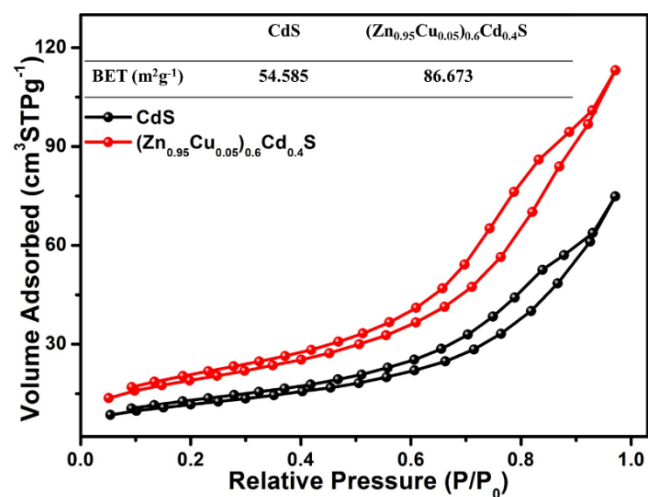

**Figure S17** Nitrogen adsorption/desorption isotherms of CdS and  $(\text{Zn}_{0.95}\text{Cu}_{0.05})_{0.6}\text{Cd}_{0.4}\text{S}$ .

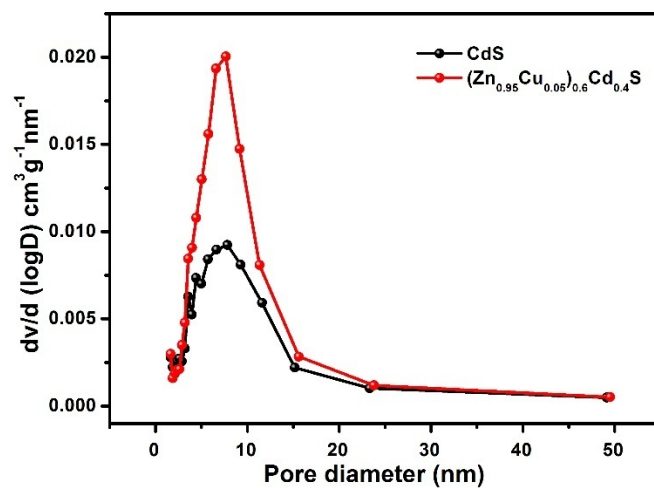

**Figure S18** BJH pore size distribution from adsorption branch of CdS and  $(\text{Zn}_{0.95}\text{Cu}_{0.05})_{0.6}\text{Cd}_{0.4}\text{S}$ .



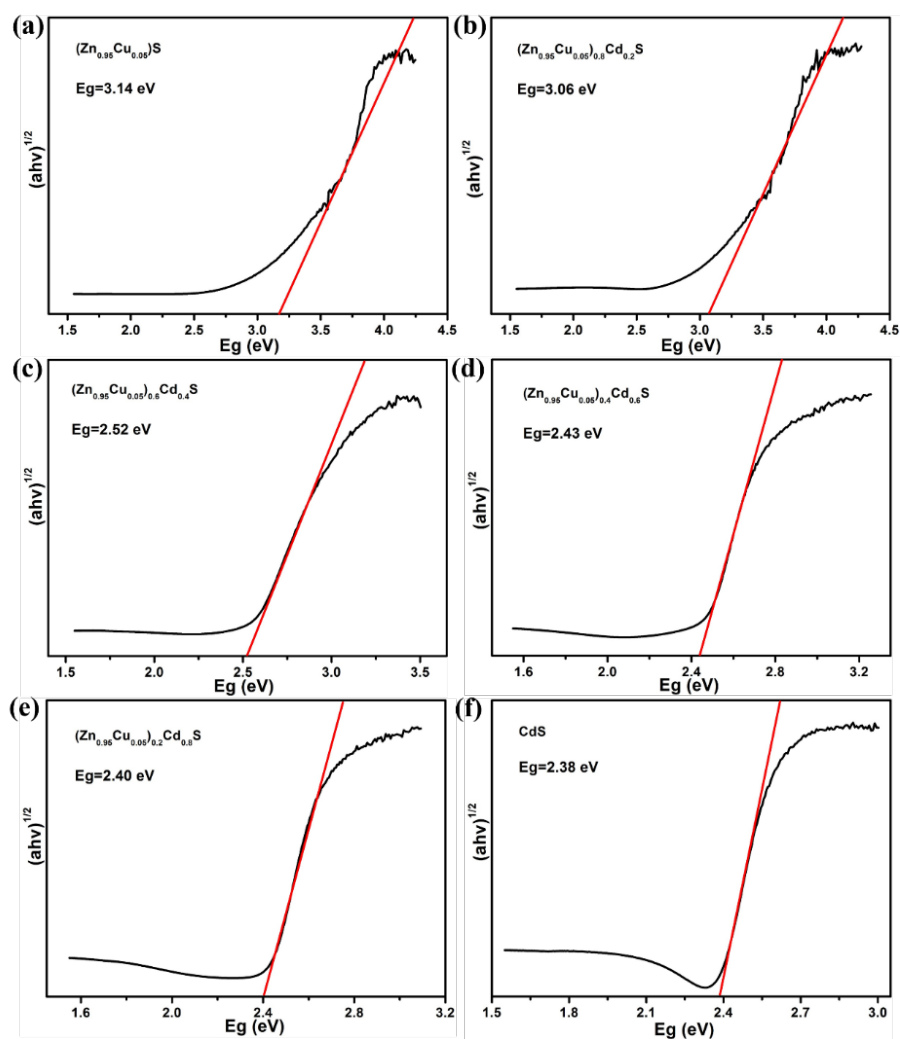

**Figure S19** The bandgaps of  $(\text{Zn}_{0.95}\text{Cu}_{0.05})\text{S}$  (a),  $(\text{Zn}_{0.95}\text{Cu}_{0.05})_{0.8}\text{Cd}_{0.2}\text{S}$  (b),  $(\text{Zn}_{0.95}\text{Cu}_{0.05})_{0.6}\text{Cd}_{0.4}\text{S}$  (c),  $(\text{Zn}_{0.95}\text{Cu}_{0.05})_{0.4}\text{Cd}_{0.6}\text{S}$  (d),  $(\text{Zn}_{0.95}\text{Cu}_{0.05})_{0.2}\text{Cd}_{0.8}\text{S}$  (e) and  $\text{CdS}$  (f) calculated according to the Kubelka-Munk (KM) method.

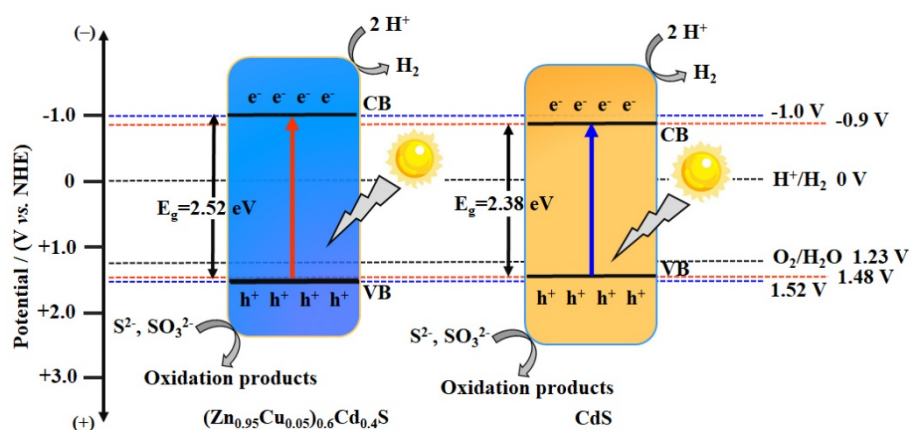

**Figure S20** Mechanism of  $(\text{Zn}_{0.95}\text{Cu}_{0.05})_{0.6}\text{Cd}_{0.4}\text{S}$  and  $\text{CdS}$  for photocatalytic hydrogen production.

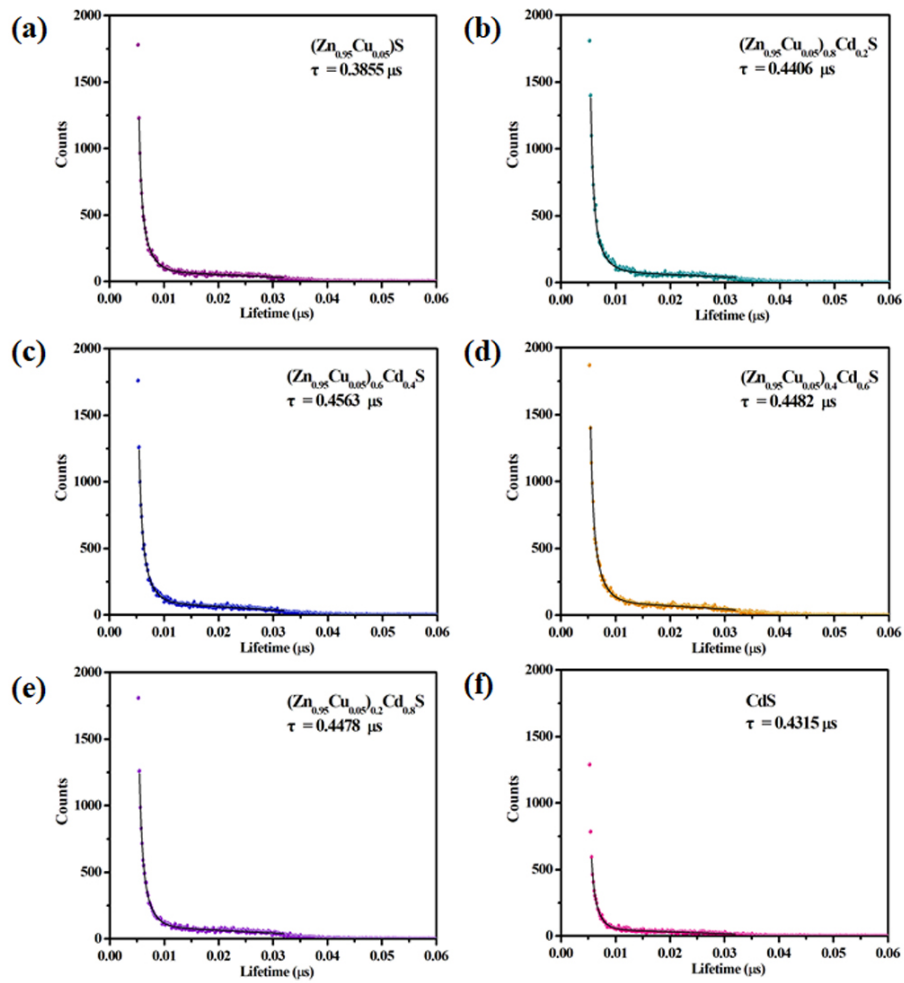

**Figure S21** Decay curves and luminescent lifetimes of  $(\text{Zn}_{0.95}\text{Cu}_{0.05})\text{S}$  (a),  $(\text{Zn}_{0.95}\text{Cu}_{0.05})_{0.8}\text{Cd}_{0.2}\text{S}$  (b),  $(\text{Zn}_{0.95}\text{Cu}_{0.05})_{0.6}\text{Cd}_{0.4}\text{S}$  (c),  $(\text{Zn}_{0.95}\text{Cu}_{0.05})_{0.4}\text{Cd}_{0.6}\text{S}$  (d),  $(\text{Zn}_{0.95}\text{Cu}_{0.05})_{0.2}\text{Cd}_{0.8}\text{S}$  (e) and  $\text{CdS}$  (f).

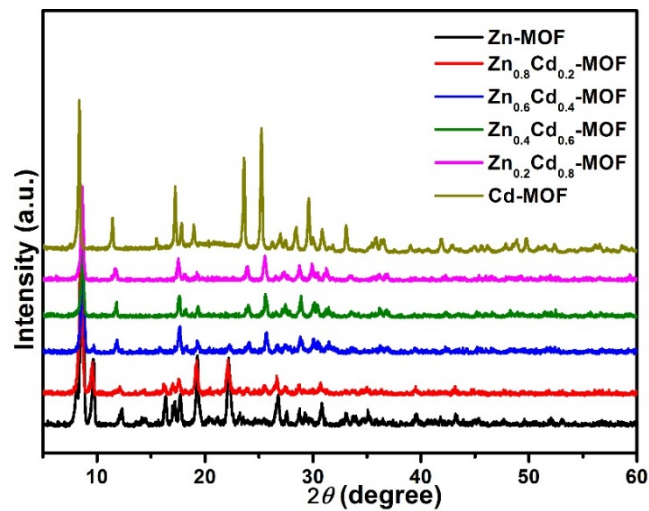

**Figure S22** PXRD patterns of  $(\text{Zn}_{1-x}\text{Cd}_x)\text{-MOF}$  ( $x = 0, 0.2, 0.4, 0.6, 0.8, 1.0$ ).



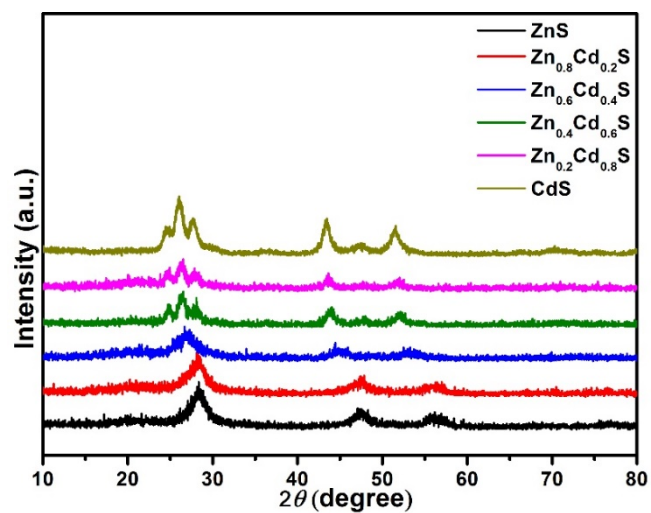

**Figure S23** PXRD patterns of  $(\text{Zn}_{1-x}\text{Cd}_x)\text{S}$  solid solutions ( $x=0, 0.2, 0.4, 0.6, 0.8, 1.0$ ).

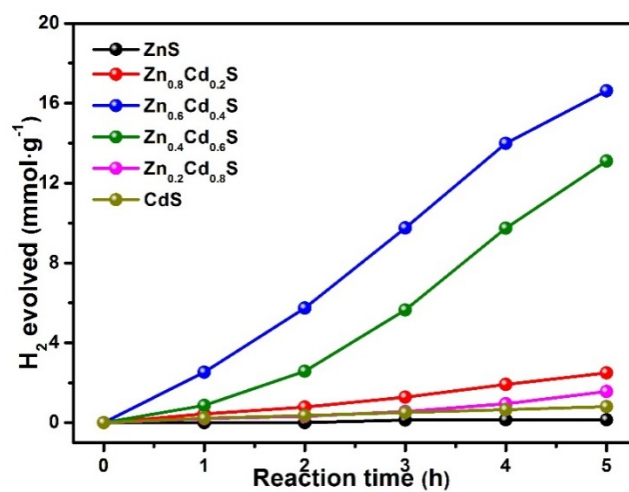

**Figure S24** Photocatalytic performance of  $(\text{Zn}_{1-x}\text{Cd}_x)\text{S}$  solid solutions.

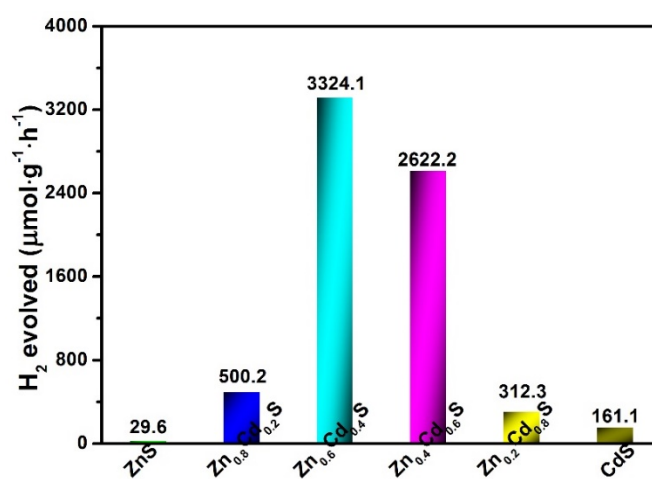

**Figure S25** Comparison of photocatalytic HER of  $(\text{Zn}_{1-x}\text{Cd}_x)\text{S}$  solid solutions.

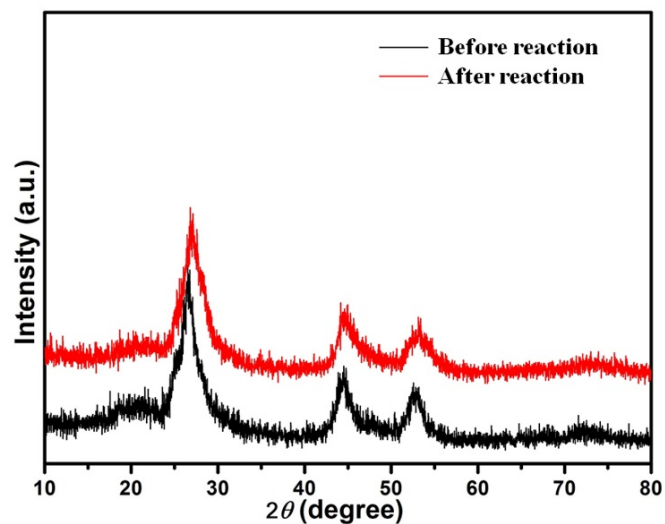

**Figure S26** XRD patterns of  $(\text{Zn}_{0.95}\text{Cu}_{0.05})_{0.6}\text{Cd}_{0.4}\text{S}$  collected after photocatalytic hydrogen evolution experiment.

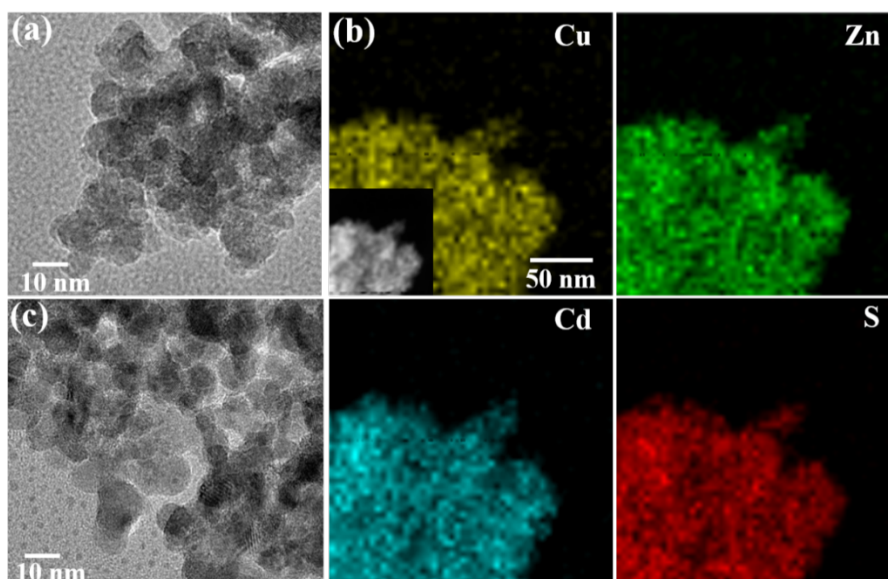

**Figure S27** (a) TEM image of  $(\text{Zn}_{0.95}\text{Cu}_{0.05})_{0.6}\text{Cd}_{0.4}\text{S}$  before reaction, (b) elemental mapping images, and (c) TEM image of  $(\text{Zn}_{0.95}\text{Cu}_{0.05})_{0.6}\text{Cd}_{0.4}\text{S}$  collected after photocatalytic hydrogen evolution experiment.

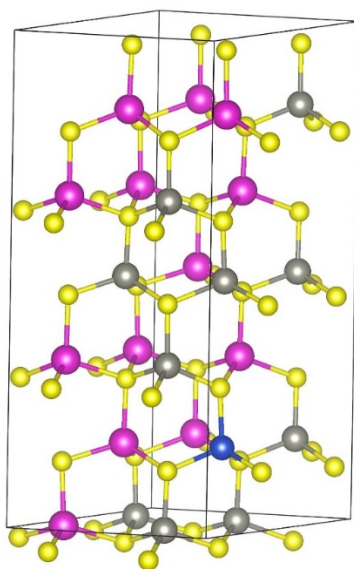

**Figure S28** Solid solution model of  $(\text{Zn}_{0.95}\text{Cu}_{0.05})_{0.6}\text{Cd}_{0.4}\text{S}$  (grey: Zn, blue: Cu, pink: Cd, yellow: S).

**Table S1.** The experimental data of inductively coupled plasma optical emission spectrometry (ICP-OES) and elemental analyses of  $(\text{Zn}_{0.95}\text{Cu}_{0.05})_{1-x}\text{Cd}_x\text{S}$  solid solutions.

| Sample                                                            | Weight percentage (wt %) |      |       |       |      | Atomic percentage (at %) |      |       |       |       |
|-------------------------------------------------------------------|--------------------------|------|-------|-------|------|--------------------------|------|-------|-------|-------|
|                                                                   | Zn                       | Cu   | Cd    | S     | C    | Zn                       | Cu   | Cd    | S     | C     |
| $(\text{Zn}_{0.95}\text{Cu}_{0.05})\text{S}$                      | 52.80                    | 4.37 | -     | 35.86 | 6.97 | 31.62                    | 2.63 | -     | 43.46 | 22.29 |
| $(\text{Zn}_{0.95}\text{Cu}_{0.05})_{0.8}\text{Cd}_{0.2}\text{S}$ | 49.00                    | 4.31 | 6.72  | 32.74 | 7.23 | 31.11                    | 2.54 | 2.40  | 40.95 | 23.00 |
| $(\text{Zn}_{0.95}\text{Cu}_{0.05})_{0.6}\text{Cd}_{0.4}\text{S}$ | 21.70                    | 2.58 | 51.7  | 20.83 | 3.19 | 19.41                    | 2.27 | 26.14 | 37.5  | 14.68 |
| $(\text{Zn}_{0.95}\text{Cu}_{0.05})_{0.4}\text{Cd}_{0.6}\text{S}$ | 5.97                     | 1.42 | 69.90 | 21.34 | 1.37 | 6.61                     | 1.30 | 40.91 | 43.99 | 7.19  |
| $(\text{Zn}_{0.95}\text{Cu}_{0.05})_{0.2}\text{Cd}_{0.8}\text{S}$ | 2.58                     | 0.47 | 75.30 | 20.73 | 0.92 | 2.78                     | 0.48 | 46.50 | 44.97 | 5.27  |
| CdS                                                               | -                        | -    | 81.00 | 18.21 | 0.79 | -                        | -    | 53.21 | 41.99 | 4.80  |

**Table S2** The energy positions of conduction and valence bands of samples. (ECB based on Mott-Schottky plots)

| Sample                                                                      | E <sub>g</sub> (eV) | ECB (vs. NHE) | EVB (vs. NHE) |
|-----------------------------------------------------------------------------|---------------------|---------------|---------------|
| (Zn <sub>0.95</sub> Cu <sub>0.05</sub> )S                                   | 3.14                | -1.11         | 2.03          |
| (Zn <sub>0.95</sub> Cu <sub>0.05</sub> ) <sub>0.8</sub> Cd <sub>0.2</sub> S | 3.06                | -1.22         | 1.84          |
| (Zn <sub>0.95</sub> Cu <sub>0.05</sub> ) <sub>0.6</sub> Cd <sub>0.4</sub> S | 2.52                | -1.00         | 1.52          |
| (Zn <sub>0.95</sub> Cu <sub>0.05</sub> ) <sub>0.4</sub> Cd <sub>0.6</sub> S | 2.43                | -1.38         | 1.05          |
| (Zn <sub>0.95</sub> Cu <sub>0.05</sub> ) <sub>0.2</sub> Cd <sub>0.8</sub> S | 2.40                | -1.31         | 1.09          |
| CdS                                                                         | 2.38                | -0.50         | 1.88          |

**Table S3.** Comparison of the H<sub>2</sub>-production rates of CuS<sub>x</sub> cocatalysts solid solution for water splitting

| Catalysts                                                                   | Light source           | Photocatalytic reactions                                                        | Activity<br>μmol·h <sup>-1</sup> ·g <sup>-1</sup> | AQE                | Stability | Ref          |
|-----------------------------------------------------------------------------|------------------------|---------------------------------------------------------------------------------|---------------------------------------------------|--------------------|-----------|--------------|
| CuS/Cd <sub>0.4</sub> Zn <sub>0.6</sub> S                                   | (300 W Xe)<br>> 420 nm | S <sup>2-</sup> /SO <sub>3</sub> <sup>2-</sup> ;<br>None noble metal cocatalyst | 1000                                              | -                  | > 4 h     | [5]          |
| Cu <sub>1.94</sub> S-Zn <sub>0.23</sub> Cd <sub>0.77</sub> S                | (300 W Xe)<br>> 420 nm | S <sup>2-</sup> /SO <sub>3</sub> <sup>2-</sup> ;<br>None noble metal cocatalyst | 7735                                              | 26.4% at<br>420nm  | <20 h     | [6]          |
| CuS/Zn <sub>0.8</sub> Cd <sub>0.2</sub> S                                   | (500 W Xe)             | S <sup>2-</sup> /SO <sub>3</sub> <sup>2-</sup> ;<br>None noble metal cocatalyst | 2792                                              | 36.7% at<br>420 nm | -         | [7]          |
| (Zn <sub>0.95</sub> Cu <sub>0.05</sub> ) <sub>0.6</sub> Cd <sub>0.4</sub> S | (300 W Xe)<br>> 420 nm | S <sup>2-</sup> /SO <sub>3</sub> <sup>2-</sup> ;<br>None noble metal cocatalyst | 4150.1                                            | 7.91% at<br>420nm  | > 40 h    | This<br>work |

**Table S4.** Comparison of the H<sub>2</sub>-production rates of CdS-based solid solution for water splitting

| Catalysts                                                                     | Light source                      | Photocatalytic reactions                                                        | Activity<br>$\mu\text{mol}\cdot\text{h}^{-1}\cdot\text{g}^{-1}$ | AQE                | Stability | Ref  |
|-------------------------------------------------------------------------------|-----------------------------------|---------------------------------------------------------------------------------|-----------------------------------------------------------------|--------------------|-----------|------|
| Cd <sub>0.5</sub> Zn <sub>0.5</sub> S<br>nanorod                              | (300 W Xe)<br>> 430 nm            | S <sup>2-</sup> /SO <sub>3</sub> <sup>2-</sup> ;<br>None noble metal cocatalyst | 2580                                                            | 62% at<br>425 nm   | 28 h      | [8]  |
| 1D Cd <sub>0.8</sub> Zn <sub>0.2</sub> S                                      | (300 W Xe)<br>> 400 nm            | S <sup>2-</sup> /SO <sub>3</sub> <sup>2-</sup> ;<br>DMF                         | 157.46                                                          | -                  | <12 h     | [9]  |
| Zn <sub>0.5</sub> Cd <sub>0.5</sub> S porous<br>nanosheets                    | (300 W Xe)<br>> 420 nm            | S <sup>2-</sup> /SO <sub>3</sub> <sup>2-</sup> ;<br>None noble metal cocatalyst | 1667                                                            | -                  | 15 h      | [10] |
| Cd <sub>0.5</sub> Zn <sub>0.5</sub> S                                         | (300 W Xe)<br>> 430 nm            | S <sup>2-</sup> /SO <sub>3</sub> <sup>2-</sup> ;<br>None noble metal cocatalyst | 1790                                                            | 43% at<br>420 nm   | 30 h      | [11] |
| Hollow Zn <sub>0.6</sub> Cd <sub>0.4</sub> S<br>cages                         | (300 W Xe)<br>> 420 nm            | S <sup>2-</sup> /SO <sub>3</sub> <sup>2-</sup> ;<br>None noble metal cocatalyst | 5680                                                            | -                  | 30 h      | [12] |
| Zn <sub>0.5</sub> Cd <sub>0.5</sub> S                                         | (350 W Xe)<br>> 400 nm            | S <sup>2-</sup> /SO <sub>3</sub> <sup>2-</sup> ;<br>None noble metal cocatalyst | 7420                                                            | 9.6% at<br>420 nm  | -         | [13] |
| ZnS/Zn <sub>1-x</sub> Cd <sub>x</sub> S/CdS                                   | (300 W Xe)<br>> 420 nm            | S <sup>2-</sup> /SO <sub>3</sub> <sup>2-</sup> ;<br>None noble metal cocatalyst | 106500                                                          | -                  | 60 h      | [14] |
| Zn <sub>0.5</sub> Cd <sub>0.5</sub> S/PdP <sub>-0.33</sub> S <sub>-1.67</sub> | (300 W Xe)<br>> 420 nm            | ascorbic acid;<br>None noble metal cocatalyst                                   | 372120                                                          | 19.7% at<br>420 nm | 50 h      | [15] |
| Ni <sup>2+</sup> -doped Zn <sub>x</sub> Cd <sub>1-x</sub> S                   | (300 W Xe)<br>> 420 nm            | S <sup>2-</sup> /SO <sub>3</sub> <sup>2-</sup> ;<br>None noble metal cocatalyst | 18820                                                           | 22.8% at<br>420 nm | 4 h       | [16] |
| NiS/Zn <sub>0.5</sub> Cd <sub>0.5</sub> S/RGO                                 | AM1.5, 100<br>mW cm <sup>-2</sup> | S <sup>2-</sup> /SO <sub>3</sub> <sup>2-</sup> ;<br>None noble metal cocatalyst | 7514                                                            | 31.1% at<br>420 nm | 12 h      | [17] |
| NiS-Zn <sub>0.8</sub> Cd <sub>0.2</sub> S                                     | (300 W Xe)<br>≥ 420 nm            | Triethanolamine;<br>None noble metal cocatalyst                                 | 2507                                                            | -                  | 9 h       | [18] |
| Ni(OH) <sub>2</sub> -Zn <sub>0.8</sub> Cd <sub>0.2</sub> S                    | (300 W Xe)<br>≥ 420 nm            | Triethanolamine;<br>None noble metal cocatalyst                                 | 7160                                                            | 29.5% at<br>420 nm | 9 h       | [18] |
| Ni-Zn <sub>0.8</sub> Cd <sub>0.2</sub> S                                      | (300 W Xe)<br>≥ 420 nm            | Triethanolamine;<br>None noble metal cocatalyst                                 | 3242                                                            | -                  | 9 h       | [18] |
| NiO-Zn <sub>0.8</sub> Cd <sub>0.2</sub> S                                     | (350 W Xe)<br>≥ 420 nm            | Triethanolamine;<br>None noble metal cocatalyst                                 | 117                                                             | -                  | 9 h       | [18] |
| NiS/Zn <sub>0.5</sub> Cd <sub>0.5</sub> S                                     | (300 W Xe)<br>> 420 nm            | S <sup>2-</sup> /SO <sub>3</sub> <sup>2-</sup> ;<br>None noble metal cocatalyst | 16780                                                           | -                  | > 20 h    | [19] |
| 1T-1Li <sub>x</sub> MoS <sub>2</sub> /Cd <sub>0.5</sub> Zn <sub>0.5</sub> S   | (300 W Xe)                        | S <sup>2-</sup> /SO <sub>3</sub> <sup>2-</sup> ;                                | 7699                                                            | -                  | 20 h      | [20] |

|                                                                               |               |                                                  |        |          |        |      |
|-------------------------------------------------------------------------------|---------------|--------------------------------------------------|--------|----------|--------|------|
| $_{5S}$                                                                       | $\geq 420$ nm | None noble metal cocatalyst                      |        |          |        |      |
| MoS <sub>2</sub> /Mn <sub>0.5</sub> Cd <sub>0.5</sub> S                       | (300 W Xe)    | S <sup>2-</sup> /SO <sub>3</sub> <sup>2-</sup> ; | 3938   | -        | 12 h   | [21] |
|                                                                               | $> 420$ nm    | None noble metal cocatalyst                      |        |          |        |      |
| PdS/Mn <sub>0.5</sub> Cd <sub>0.5</sub> S                                     | (300 W Xe)    | S <sup>2-</sup> /SO <sub>3</sub> <sup>2-</sup> ; | 12280  | -        | <12 h  | [21] |
|                                                                               | $> 420$ nm    | None noble metal cocatalyst                      |        |          |        |      |
| Cu <sub>x</sub> S/Mn <sub>0.5</sub> Cd <sub>0.5</sub> S                       | (300 W Xe)    | S <sup>2-</sup> /SO <sub>3</sub> <sup>2-</sup> ; | 6940   | -        | 12 h   | [21] |
| (1≤x≤2)                                                                       | $> 420$ nm    | None noble metal cocatalyst                      |        |          |        |      |
| MoS <sub>2</sub> /Mn <sub>0.25</sub> Cd <sub>0.75</sub> S                     | (300 W Xe)    | S <sup>2-</sup> /SO <sub>3</sub> <sup>2-</sup> ; | 12470  | 2.37% at | <24 h  | [22] |
|                                                                               | $> 400$ nm    | None noble metal cocatalyst                      |        | 420 nm   |        |      |
| Cu-doped Zn <sub>0.5</sub> Cd <sub>0.5</sub> S                                | (300 W Xe)    | S <sup>2-</sup> /SO <sub>3</sub> <sup>2-</sup> ; | 21400  | 18.8% at | <9h    | [23] |
|                                                                               | $\geq 420$ nm | None noble metal cocatalyst                      |        | 428 nm   |        |      |
| Cd <sub>0.1</sub> Cu <sub>0.01</sub> Zn <sub>0.89</sub> S                     | (350 W Xe)    | S <sup>2-</sup> /SO <sub>3</sub> <sup>2-</sup> ; | 1167   | 9.6% at  | 10 h   | [24] |
|                                                                               | $\geq 430$ nm | None noble metal cocatalyst                      |        | 420 nm   |        |      |
| (Zn <sub>0.95</sub> Cu <sub>0.05</sub> ) <sub>0.67</sub> Cd <sub>0.33</sub> S | (300 W Xe)    | S <sup>2-</sup> /SO <sub>3</sub> <sup>2-</sup> ; | 1693   | 15.7% at | <12 h  | [25] |
|                                                                               | $\geq 420$ nm | None noble metal cocatalyst                      |        | 420 nm   |        |      |
| (Zn <sub>0.95</sub> Cu <sub>0.05</sub> ) <sub>0.6</sub> Cd <sub>0.4</sub> S   | (300 W Xe)    | S <sup>2-</sup> /SO <sub>3</sub> <sup>2-</sup> ; | 4150.1 | 7.91% at | > 40 h | This |
|                                                                               | $> 420$ nm    | None noble metal cocatalyst                      |        | 420 nm   |        | work |

## Reference:

- (1) Huo, J. P.; Zeng, H. P. Copper Nanoparticles Embedded in the Triphenylamine Functionalized Bithiazole-metal Complex as Active Photocatalysts for Visible Light-driven Hydrogen Evolution. *J. Mater. Chem. A* **2015**, *3*, 17201-17208.
- (2) Blöchl, P. E. Projector Augmented-wave Method. *Phys. Rev. B: Solid State* **1994**, *50*, 17953-17979.
- (3) Perdew, J. P.; Burke, K.; Ernzerhof, M. Generalized Gradient Approximation Made Simple. *Phys. Rev. Lett.* **1996**, *77*, 3865-3868.
- (4) Monkhorst, H. J.; Pack, J. D. Special Points for Brillouin-zone Integrations. *Phys. Rev. B: Solid State* **1976**, *13*, 5188.
- (5) Wang, J.; Li, B.; Chen, J. Z.; Li, N.; Zheng, J. F.; Zhao, J. H.; Zhu, Z. P. Enhanced Photocatalytic H<sub>2</sub>-production Activity of Cd<sub>x</sub>Zn<sub>1-x</sub>S Nanocrystals by Surface Loading MS (M = Ni, Co, Cu) Species. *Appl. Surf. Sci.* **2012**, *259*, 118-123.
- (6) Chen, Y.; Zhao, S.; Wang, X.; Peng, Q.; Lin, R.; Wang, Y.; Shen, R.; Cao, X.; Zhou, G.; Li, J.; Xia, A.; Li, Y. Synergetic Integration of Cu<sub>1.94</sub>S-Zn<sub>x</sub>Cd<sub>1-x</sub>S Heteronanorods for Enhanced Visible-light-driven Photocatalytic Hydrogen Production. *J. Am. Chem. Soc.* **2016**, *138*, 4286-4289.
- (7) Zhang L. J.; Jiang T. F.; Li S.; Lu Y. C.; Wang L. L.; Zhang X. Q.; Wang D. J.; Xie T. F. Enhancement of Photocatalytic H<sub>2</sub> Evolution on Zn<sub>0.8</sub>Cd<sub>0.2</sub>S Loaded with CuS as Cocatalyst and Its Photogenerated Charge Transfer Properties. *Dalton Trans.* **2013**, *42*, 12998-13003.
- (8) Liu, M.; Jing, D.; Zhou, Z.; Guo, L. Twin-induced One-dimensional Homojunctions Yield High Quantum Efficiency for Solar Hydrogen Generation. *Nat. Commun.* **2013**, *4*, 2278.
- (9) Han, Z.; Chen, G.; Li, C.; Yu, Y.; Zhou, Y. Preparation of 1D Cubic Cd<sub>0.8</sub>Zn<sub>0.2</sub>S Solid-solution Nanowires Using Levelling Effect of TGA and Improved Photocatalytic H<sub>2</sub>-production Activity. *J. Mater. Chem. A* **2015**, *3*, 1696-1702.
- (10) Yu, Y.; Zhang, J.; Wu, X.; Zhao, W.; Zhang, B. Nanoporous Single-crystal-like Cd<sub>x</sub>Zn<sub>1-x</sub>S Nanosheets Fabricated by the Cation-exchange Reaction of Inorganic-organic Hybrid ZnS-amine with Cadmium Ions. *Angew. Chem., Int. Ed.* **2012**, *51*, 897-900.
- (11) Liu, M.; Wang, L.; Lu, G. M.; Yao, X.; Guo, L. Twins in Cd<sub>1-x</sub>Zn<sub>x</sub>S Solid Solution: Highly Efficient Photocatalyst for Hydrogen Generation from Water. *Energy Environ. Sci.* **2011**, *4*, S-23

1372-1378.

- (12) Chen, J. M.; Chen, J. Y.; Li, Y. W. Hollow ZnCdS Dodecahedral Cages for Highly Efficient Visible-light-driven Hydrogen Generation. *J. Mater. Chem. A* **2017**, *5*, 24116-24125.
- (13) Li, Q.; Meng, H.; Zhou, P.; Zheng, Y.; Wang, J.; Yu, J.; Gong, J. Zn<sub>1-x</sub>Cd<sub>x</sub>S Solid Solutions with Controlled Bandgap and Enhanced Visible-light Photocatalytic H<sub>2</sub>-production Activity. *ACS Catal.* **2013**, *3*, 882-889.
- (14) Li, K.; Chen, R.; Li, S. L.; Han, M.; Xie, S. L.; Bao, J. C.; Dai, Z. H.; Lan, Y. Q. Self-assembly of a Mesoporous ZnS/Mediating Interface/CdS Heterostructure with Enhanced Visible-light Hydrogen-production Activity and Excellent Stability. *Chem. Sci.* **2015**, *6*, 5263-5268.
- (15) Song, J.; Zhao, H.; Sun, R.; Li, X.; Sun, D. An Efficient Hydrogen Evolution Catalyst Composed of Palladium Phosphorous Sulphide (PdPB<sub>0.33</sub>SB<sub>1.67</sub>) and Twin Nanocrystal Zn<sub>0.5</sub>Cd<sub>0.5</sub>S Solid Solution with Both Homo- and Hetero-junctions. *Energy Environ. Sci.* **2017**, *10*, 225-235.
- (16) Wang, Y. B.; Wu, J. C.; Zheng, J. W.; Jiang, R. R.; Xu, R. Ni<sup>2+</sup>-doped Zn<sub>x</sub>Cd<sub>1-x</sub>S Photocatalysts from Single-source Precursors for Efficient Solar Hydrogen Production under Visible Light Irradiation. *Catal. Sci. Technol.* **2012**, *2*, 581-588.
- (17) Zhang, J.; Qi, L. F.; Ran, J. R.; Yu, J. G.; Qiao, S. Z. Ternary NiS/Zn<sub>x</sub>Cd<sub>1-x</sub>S/Reduced Graphene Oxide Nanocomposites for Enhanced Solar Photocatalytic H<sub>2</sub>-production Activity. *Adv. Energy Mater.* **2014**, *4*, 1301925.
- (18) Ran, J. R.; Zhang, J.; Yu, J. G.; Qiao, S. Z. Enhanced Visible-light Photocatalytic H<sub>2</sub> Production by Zn<sub>x</sub>Cd<sub>1-x</sub>S Modified with Earth-abundant Nickel-based Cocatalysts. *ChemSusChem* **2014**, *7*, 3426-3434.
- (19) Zhao, X. X.; Feng, J. R.; Liu, J.; Shi, W.; Yang, G. M.; Wang, G. C.; Cheng, P. An Efficient, Visible-light-driven, Hydrogen Evolution Catalyst NiS/Zn<sub>x</sub>Cd<sub>1-x</sub>S Nanocrystal Derived from a Metal-organic Framework. *Angew. Chem. Int. Ed.* **2018**, *57*, 9790-9794.
- (20) Du, H.; Guo, H. L.; Liu, Y. N.; Xie, X.; Liang, K.; Zhou, X.; Wang, X.; Xu, A. W. Metallic 1T-Li<sub>x</sub>MoS<sub>2</sub> Cocatalyst Significantly Enhanced the Photocatalytic H<sub>2</sub> Evolution over Cd<sub>0.5</sub>Zn<sub>0.5</sub>S Nanocrystals under Visible Light Irradiation. *ACS Appl. Mater. Interfaces* **2016**, *8*, 4023-4030.



- (21) Zhai, H. S.; Liu, X. L.; Wang, P.; Huang, B. B.; Zhang, Q. Q. Enhanced Photocatalytic H<sub>2</sub> Production of Mn<sub>0.5</sub>Cd<sub>0.5</sub>S Solid Solution through Loading Transition Metal Sulfides XS (X = Mo, Cu, Pd) Cocatalysts. *Appl. Surf. Sci.* **2018**, *430*, 515-522.
- (22) Huang, Q. Z.; Xiong, Y.; Zhang, Q.; Yao, H. C.; Li, Z. J. Noble Metal-free MoS<sub>2</sub> Modified Mn<sub>0.25</sub>Cd<sub>0.75</sub>S for Highly Efficient Visible-light Driven Photocatalytic H<sub>2</sub> Evolution. *Appl. Catal. B: Environ.* **2017**, *209*, 514-522.
- (23) Mei, Z.; Zhang, B.; Zheng, J.; Yuan, S.; Zhuo, Z.; Meng, X.; Chen, Z.; Amine, K.; Yang, W.; Wang, L.; Wang, W.; Wang, S.; Gong, Q.; Li, J.; Liu, F.; Feng, P. Tuning Cu Dopant of Zn<sub>0.5</sub>Cd<sub>0.5</sub>S Nanocrystals Enables High-performance Photocatalytic H<sub>2</sub> Evolution from Water Splitting under Visible-light Irradiation. *Nano Energy* **2016**, *26*, 405-416.
- (24) Liu, G. J.; Zhao, L.; Ma, L. J.; Guo, L. J. Photocatalytic H<sub>2</sub> Evolution under Visible Light Irradiation on a Novel Cd<sub>x</sub>Cu<sub>y</sub>Zn<sub>1-x-y</sub>S Catalyst. *Catal. Commun.* **2008**, *9* 126-130.
- (25) Zhang, W.; Zhong, Z.; Wang, Y.; Xu, R. Doped Solid Solution: (Zn<sub>0.95</sub>Cu<sub>0.05</sub>)<sub>1-x</sub>Cd<sub>x</sub>S Nanocrystals with High Activity for H<sub>2</sub> Evolution from Aqueous Solutions under Visible Light. *J. Phys. Chem. C* **2008**, *112*, 17635-17642.
